# Supplementary material
Source: Springer Nature journal article supplement (https://www.springermedizin.de/resource/supplementary/13047_2010_131_MOESM2_ESM.pdf/9663212)

**A**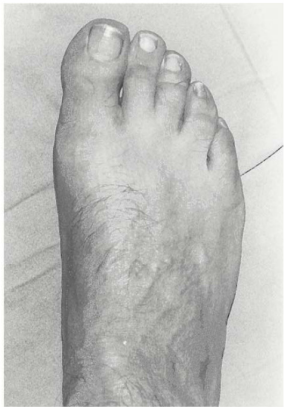**B**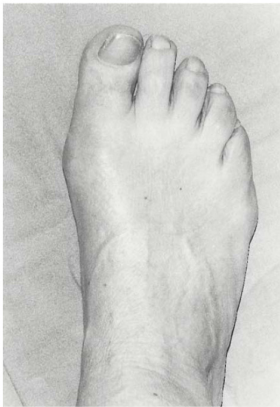**C**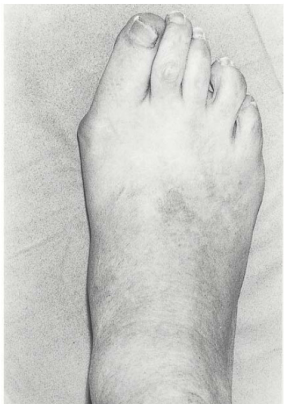**D**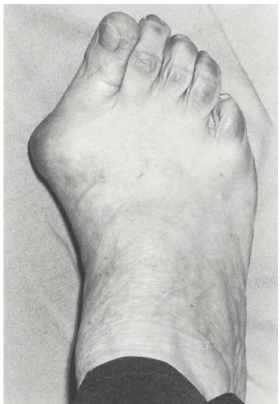

Supplement: MOESM2 [file 9663212]
